# Supplementary material for: Nurses’ Perception and Performance of End-of-Life Care in a Tertiary Hospital
Source: PubMed Central journal article supplement — J Hosp Palliat Care. 2023 Sep 1;26(3):101–11. doi: 10.14475/jhpc.2023.26.3.101 (PMC10542992; doi:10.14475/jhpc.2023.26.3.101), 2023-09-01
Supplement: jhpc-26-3-101-supple.pdf [file jhpc-26-3-101-supple.pdf]

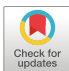

## 일 상급종합병원 간호사의 임종간호에 대한 인식과 수행

정서연\*, 송현승\*, 김지연\*, 구회정<sup>†</sup>, 신용순<sup>‡</sup>, 김성렬<sup>§</sup>, 김정혜<sup>||</sup>

\*서울아산병원 간호부, <sup>†</sup>서울아산병원 진료부, <sup>‡</sup>한양대학교 간호대학, <sup>§</sup>고려대학교 간호대학, <sup>||</sup>울산대학교 임상전문간호학

# Nurses' Perception and Performance of End-of-Life Care in a Tertiary Hospital

Seo Yeon Jung, R.N., M.S.N.\*, Hyun Seung Song, R.N., M.S.N.\*,  
Ji Youn Kim, R.N., M.S.N.\*, Hoi Jung Koo, R.N., M.S.N.<sup>†</sup>, Yong Soon Shin, R.N., A.P.N., Ph.D.<sup>‡</sup>,  
Sung Reul Kim, R.N., Ph.D.<sup>§</sup> and Jeong Hye Kim, R.N., Ph.D.<sup>||</sup>

\*Department of Nursing, Asan Medical Center,

<sup>†</sup>Clinical Directorate, Asan Medical Center,

<sup>‡</sup>College of Nursing, Hanyang University,

<sup>§</sup>College of Nursing, Korea University,

<sup>||</sup>Department of Clinical Nursing, University of Ulsan, Seoul, Korea

**Purpose:** This study aimed to identify levels of perception and performance of end-of-life care among nurses and to investigate correlations between perception and performance.

**Methods:** This cross-sectional descriptive survey included 321 nurses from a tertiary hospital in Seoul, Korea. The participants had at least 6 months of work experience and had been involved in end-of-life care at least once, in either ward or intensive care unit settings.

A structured questionnaire was utilized to assess their perception and performance of end-of-life care. **Results:** The mean score for perception of end-of-life care was  $3.23 \pm 0.34$ , while the score for performance of end-of-life care was  $3.08 \pm 0.34$ . There was a significant positive correlation between nurses' perception of end-of-life care and their performance in this area ( $r=0.78$ ,  $P<0.001$ ).

**Conclusion:** It is necessary to change perceptions regarding end-of-life care and to develop systematic and standardized education programs including content such as assessing the hydration status of dying patients, evaluating mental aspects such as suicidal ideation, and providing spiritual care for nurses working in end-of-life departments.

**Key Words:** Terminal care, Nurses, Perception, Work performance

Received April 13, 2023

Revised July 24, 2023

Accepted July 25, 2023

### Correspondence to

Jeong Hye Kim

ORCID:

<https://orcid.org/0000-0001-5384-706X>

E-mail: [jhkimnur@ulsan.ac.kr](mailto:jhkimnur@ulsan.ac.kr)

### Funding/Support

This article was financially supported by the Department of Nursing, Asan Medical Center.

## 서론

### 1. 연구의 필요성

우리나라에서는 호스피스·완화의료 및 임종 과정에 있는 환자

의 자기결정을 존중하고 인간으로서의 존엄과 가치를 보호하기 위한 연명의료결정에 관한 법률이 시행되고 있으며[1], 좋은 죽음의 질은 임종 환자의 중요한 목표로 여겨지고 있다[2]. 인구의 고령화와 의료서비스의 변화에 따라 급성기 병원에서 환자의 사망이 증가하고 있으며[3,4], 우리나라에서도 의료기관이 사망 장

This is an Open Access article distributed under the terms of the Creative Commons Attribution Non-Commercial License (<http://creativecommons.org/licenses/by-nc/4.0/>) which permits unrestricted non-commercial use, distribution, and reproduction in any medium, provided the original work is properly cited.

소의 74.8%를 차지하고 있다[5]. 이로 인해 임상현장에서 임종간호의 중요성이 대두되고 있으며, 양질의 임종간호를 제공하는 것은 전 세계 보건의료의 우선순위이다[6].

상급종합병원과 같은 급성기 치료환경에서 일하는 의료진은 질병의 진단에서 임종기 치료까지 다양한 치료단계에서 중환자와 말기 환자를 돌보게 된다. 말기 단계에서는 무의미한 연명치료를 최소화하며, 환자에게 나쁜 예후를 알리고 공감하며 치료와 간호를 제공해야 한다[7]. 그러나, 의료진은 가족 위주, 죽음에 대한 논의를 기피하는 임상적 문화와 더불어 지원 부족 및 과중한 업무량으로 인해 임종기 환자를 돌보면서 스트레스, 죄책감, 우울 및 회의감을 경험한다[4,7]. 특히, 간호사는 양질의 임종간호를 제공하는 데 있어 가족의 요구 충족과 적절한 통증 조절에 어려움을 느끼고, 환자의 요구와 의사의 지시 사이에서 조율하는 능력이 부족하다고 자책하며 이는 결국 소진을 초래하는 것으로 나타났다[6]. 간호사는 임종기 환자의 호흡곤란, 통증, 호흡기 분비물, 혼동감과 같은 임박한 죽음을 나타내는 증상을 사정하고 증상관리 계획을 세우며[8] 신체적, 정서적 지지를 하며 환자 곁에서 가장 많은 시간을 보낸다[9]. 또한, 임종기에 나타날 수 있는 변화에 대해 가족이 준비할 수 있도록 돕고[8] 임종기 의사결정과 치료과정에서 환자와 가족을 옹호하고 지지하는 중요한 역할을 한다[9].

임종간호에 대한 연구로는 간호사를 대상으로 한 임종간호수행, 임종간호태도, 임종간호스트레스, 죽음인식 등이[10-12], 연구되어왔고, 생애 말기환자 간호에 대한 인식이 높을수록 생애 말기환자 간호수행에 긍정적인 영향을 미치는 것으로 보고되어[11] 임종간호를 수행하는 데 있어 간호사의 인식이 중요함을 알 수 있다. 선행문헌에서 임종간호수행은 대부분 환자를 중심으로 하거나 일부 가족이 포함되어 신체적, 정서적, 심리적, 사회적, 영적 영역에서 간호사의 임종간호수행 정도를 조사하였다[10,12]. 그러나, 환자와 가족의 치료에 대한 기대, 연명치료에 대한 이해 부족과 같은 환자와 가족 영역에서의 임종간호수행의 장애요인이 높게 나타나[10] 임종간호에서 임종기 환자와 더불어 가족을 포함하여야 할 필요성을 확인할 수 있었다. 또한, 연명 의료에 대한 결정 과정에서 환자와 가족을 지지하고 격려하기 위해 의사소통능력은 필수적인 간호역량으로 제시되어[13] 임종간호를 수행하는데 의사소통은 매우 중요한 요소이다. 불충분한 의사소통은 임종간호의 장애요인이며 의료진, 환자 및 가족과의 의사소통 부족은 임종기 환자의 증상관리에 있어 어려움을 초래한다[9]. 국외에서는 간호사가 양질의 임종간호를 수행할 수 있도록 임상 실무, 교육, 조직 및 정책을 포함한 근거기반실무지침을 개발하여 간호에 적용하도록 하고 있으며, 임상실무 측면에서는 임종기 환자 사정, 환자와 가족의 의사결정 지지 및 치료와 관리

에 대한 내용을 포함하고 있다[14]. 그러나, 국내에서는 임종기 환자와 가족을 대상으로 하고 의사소통을 포함하여 간호사의 임종간호에 대한 인식과 수행 연구는 부족한 실정으로 본 연구에서는 이러한 내용을 포함하여 조사하고자 하였다.

이에 본 연구에서는 상급종합병원 간호사의 임종간호에 대한 인식과 수행 정도를 조사하고 관계를 확인하여 양질의 임종간호 수행을 위한 임종간호 교육프로그램 개발을 위한 근거자료로 제공하고자 한다.

## 2. 연구의 목적

본 연구의 목적은 일 상급종합병원 간호사의 임종간호에 대한 인식과 수행 정도를 확인하고 그 관계를 파악하고자 하며 구체적인 목적은 다음과 같다.

- 첫째, 대상자의 임종간호에 대한 인식과 수행 정도를 파악한다.
- 둘째, 대상자의 일반적인 특성에 따른 임종간호에 대한 인식과 수행의 차이를 파악한다.
- 셋째, 대상자의 임종간호에 대한 인식과 수행과의 상관성을 파악한다.

## 대상 및 방법

### 1. 연구 설계

본 연구는 일 상급종합병원 간호사의 임종간호에 대한 인식과 수행 정도를 확인하고 관계를 파악하고자 하는 횡단적 서술적 조사연구이다.

### 2. 연구 대상

본 연구의 대상자는 서울시에 소재한 일 상급종합병원에서 병동과 중환자실을 포함하여 임종을 다빈도로 경험하는 부서의 간호사를 대상으로 하였다. 구체적인 대상자 선정 기준은 6개월 이상 근무하고 임종간호 경험이 1회 이상 있는 자로 본 연구의 목적을 이해하고 자발적으로 참여하고 동의한 자로 하였다. 대상자 수 산출은 G\*Power 3.1.9.2를 이용하였고, 상관관계를 위한 효과 크기 0.2, 유의수준( $\alpha$ ) 0.05, 검정력( $1-\beta$ ) 0.95로 319명이 산출되었고, 탈락률 10%를 고려하여 설문지는 360명을 대상으로 배포하였으며, 불충분한 응답을 한 설문지 39부를 제외하고 총 321명을 최종 분석하였다.

### 3. 연구 도구

본 연구에서는 임종기 환자와 가족을 대상으로 의사소통 내용을 포함한 임종간호에 대한 인식과 수행 연구도구를 개발하여 상

급종합병원 간호사의 임종간호에 대한 인식과 수행을 조사하고자 하였다. 먼저 임종간호에 대한 인식과 수행 연구도구 개발을 위한 전문가그룹을 간호학 교수 1명, 중앙전문간호사 1명, 호스피스 전담간호사 1명, 중앙내과병동 실무경력 10년 이상 간호사 1명, 중환자실 실무경력 10년 이상 간호사 1명을 포함하여 구성하였다. 이후 임종간호와 관련된 End of life care during the last days and hours: Clinical best practice guidelines [14]을 우선 선정하고 관련 지침[15-17]을 참고하여 총 29개의 예비문항을 구성하였다. 예비문항의 내용 타당도(Content validity index, CVI)를 조사하기 위해 호스피스 완화의료 자문의사 1명, 호스피스 전담간호사 1명, 간호학 교수 1명, 중앙내과 병동 수간호사 1명, 중환자실 수간호사 1명, 임상 실무경력 10년 이상인 중앙내과 병동 간호사 1명, 외과 병동 간호사 1명, 중환자실 간호사 1명을 포함한 총 8명의 전문가 집단을 구성하여 각 문항에 대하여 '매우 타당하다' 4점, '타당하다' 3점, '타당하지 않다' 2점, '전혀 타당하지 않다' 1점으로 4점 Likert 척도로 평가하고 의미가 명확하지 않거나 수정이 필요한 경우 의견을 기술하도록 하였다. 1차 전문가 타당도 평가 결과 전체 문항에 대한 CVI는 0.89였으며 CVI 0.8 미만인 5문항 중 4문항은 수정하는 과정을 거쳤는데, '수화'의 의미가 명확하지 않아 탈수정도로 수정하였고, 효과적인 약물투여경로를 '결정'하는 것은 담당 의사와 상의가 필요한 내용으로 '확인'으로 수정하였다. 약물 투여를 '중단'한다는 담당 의사와 상의가 필요한 내용으로 문항을 수정한 후 총 28문항을 구성하였다. 이후 2차 전문가 타당도 평가를 시행하였고 CVI 값은 1.0으로 나타났다. 이와 같은 과정을 통하여 연구도구를 완성하였으며 임종기 사정 11문항, 의사소통 4문항, 계획과 중재 13문항의 3개 하부 영역을 포함하여 총 28문항을 구성하였다. 임종간호에 대한 인식과 수행은 동일한 내용으로 구성되어 있고, 인식과 수행은 모두 4점 Likert 척도로 측정하며, 최저 28점에서 최고 112점이다.

**1) 임종간호에 대한 인식**

본 연구에서는 임종간호에 대한 인식은 3개의 하부 영역, 28문항의 항목으로 각 항목은 '전혀 그렇지 않다' 1점, '그렇지 않다' 2점, '그렇다' 3점, '매우 그렇다' 4점으로 4점 Likert 척도로 측정하였고, 점수가 높을수록 임종간호에 대한 인식이 높음을 의미한다. 본 연구에서 임종간호에 대한 인식의 신뢰도는 Cronbach  $\alpha$  값은 0.92였다.

**2) 임종간호수행**

본 연구에서는 임종간호수행은 동일한 3개의 하부 영역, 동일한 28문항의 항목으로 항목 각 문항은 '전혀 수행하지 않는다'

1점, '수행하지 않는다' 2점, '수행한다' 3점, '항상 수행한다' 4점으로 4점 Likert 척도로 측정하였고, 점수가 높을수록 임종간호 수행이 높음을 의미한다. 본 연구에서 신뢰도는 Cronbach  $\alpha$  값은 0.91이었다.

**4. 자료 수집 및 윤리적 고려**

본 연구는 연구기관의 임상연구심의위원회 승인(번호 2021-0362)을 받고 간호부의 자료수집허락을 받은 후 연구를 시작하였다. 임종을 다빈도로 경험하는 부서에 연구자가 직접 설문지를 배부하고 연구의 목적에 대해 대상자에게 설명한 후 자발적으로 연구에 동의한 자를 대상으로 하였으며 언제든지 중단할 수 있음을 설명하였다. 설문은 자가 기입하도록 하였고 참여자에게 답례품을 제공하였다. 수집된 설문자료 중 개인정보는 삭제한 후 연구자가 임의로 연구대상자 번호를 부여하여 관리하였고 수집된 원자료는 이중잠금장치가 있는 곳에 보관하고 책임연구자만이 접근할 수 있도록 하였다.

**5. 자료 분석**

본 연구에서 수집된 자료는 SPSS WIN 24.0 프로그램을 이용하여 다음과 분석하였다. 대상자의 일반적 특성, 임종간호에 대한 인식과 수행은 빈도와 백분율, 평균과 표준편차로 분석하였고, 대상자의 일반적인 특성에 따른 임종간호에 대한 인식과 수행은 독립표본 t-test, one way ANOVA로 확인하였고 Scheffé test로 사후검정을 하였다. 대상자의 임종간호에 대한 인식과 수행 간의 상관관계는 Pearson's correlation coefficient로 분석하였다.

**결과**

**1. 대상자의 특성**

대상자는 총 321명으로 여성이 310명(96.6%)이었고 평균 연령은 29.2±5.37세였으며 23~29세가 211명(65.7%)으로 가장 많았다. 결혼상태는 미혼이 242명(75.4%)으로 대부분이었고 136명(42.4%)이 종교가 있었으며 교육수준은 대졸이 270명(84.4%)이었다. 총 임상경력 6.13±5.34년이었으며 5년 미만이 178명(55.5%)으로 많았고, 현 부서경력 3.84±3.30년으로 5년 미만이 240명(74.8%)으로 가장 많았다. 근무부서는 병동 222명(69.2%), 중환자실 99명(30.8%)이었다. 임종간호교육을 받은 대상자는 76명(23.7%)이었고 최근 6개월 이내 담당 환자의 죽음을 경험한 적이 있는 대상자는 294명(91.6%)이었으며, 횡수는 1~5회가 219명(74.5%)으로 가장 많았다. 최근 1년 이내 가족이나 친척, 지인의 죽음을 경험한 대상자는 73명(22.7%)이었다(Table 1).

Table 1. General Characteristics of Participants (N=321).

| Characteristics                                                                           | n (%) or Mean±SD |
|-------------------------------------------------------------------------------------------|------------------|
| Sex                                                                                       |                  |
| Female                                                                                    | 310 (96.6)       |
| Male                                                                                      | 11 (3.4)         |
| Age (yr)                                                                                  | 29.2±5.37        |
| 23~29                                                                                     | 211 (65.7)       |
| 30~39                                                                                     | 87 (27.1)        |
| 40~49                                                                                     | 23 (7.2)         |
| Marital status                                                                            |                  |
| Married                                                                                   | 79 (24.6)        |
| Unmarried or other                                                                        | 242 (75.4)       |
| Religious status                                                                          |                  |
| Yes                                                                                       | 136 (42.4)       |
| No                                                                                        | 185 (57.6)       |
| Education level                                                                           |                  |
| Diploma                                                                                   | 9 (2.8)          |
| Bachelor                                                                                  | 270 (84.4)       |
| Master                                                                                    | 41 (12.8)        |
| Total clinical career (yr)                                                                | 6.13±5.34        |
| <5                                                                                        | 178 (55.5)       |
| 5~<10                                                                                     | 80 (24.9)        |
| 10~<15                                                                                    | 30 (9.3)         |
| ≥15                                                                                       | 33 (10.3)        |
| Current clinical career (yr)                                                              | 3.84±3.30        |
| <5                                                                                        | 240 (74.8)       |
| 5~<10                                                                                     | 59 (18.4)        |
| ≥10                                                                                       | 22 (6.9)         |
| Unit type                                                                                 |                  |
| Ward                                                                                      | 222 (69.2)       |
| ICU                                                                                       | 99 (30.8)        |
| Participation in education for end-of-life care                                           |                  |
| Yes                                                                                       | 76 (23.7)        |
| No                                                                                        | 244 (76.0)       |
| Patient deaths overseen within the last 6 months                                          |                  |
| Yes                                                                                       | 294 (91.6)       |
| No                                                                                        | 27 (23.7)        |
| The number of patient deaths overseen within the last 6 months*                           |                  |
| 1~5                                                                                       | 219 (74.5)       |
| 6~10                                                                                      | 55 (18.7)        |
| ≥11                                                                                       | 20 (6.8)         |
| Experiences of death of family members, relatives, and acquaintances within the past year |                  |
| Yes                                                                                       | 73 (22.7)        |
| No                                                                                        | 248 (77.3)       |

ICU: Intensive care unit, \*n=294.

## 2. 대상자의 임종간호에 대한 인식과 수행 정도

대상자의 임종간호에 대한 인식은 평균 3.23±0.34점(4점 만점)이었고, 하부 영역별 임종기 사정 3.19±0.34점, 의사소통 3.17±0.47점, 계획과 중재 3.28±0.38점이었다. 임종간호수행은 3.08±0.34점(4점 만점)이었고 임종기 사정 3.07±0.36점, 의사소통 2.99±0.48점, 계획과 중재 3.13±0.38점이었다.

임종간호에 대한 인식의 세부 항목을 살펴보면, '임종기(또는 생애말기) 환자의 연명의료 관련 법정서식 작성 유무를 확인한다'가 3.62±0.50점으로 가장 높게 나타났고, '임종기(또는 생애말기) 환자에게 구강간호, 체위변경 등을 포함한 신체적 간호를 제공한다'가 3.52±0.52점, '임종기(또는 생애말기) 환자의 통증을 포함한 증상에 대한 약물요법을 수행한다' 3.50±0.52점 순이었고, '임종기(또는 생애말기) 환자의 자살 사고에 대해 사정한다'가 2.46±0.74점으로 가장 낮게 나타났고, '임종기(또는 생애말기) 환자와 가족의 영적 요구에 따라 종교인에게 의뢰하거나 영적 간호를 제공한다'가 2.76±0.83점, '임종기(또는 생애말기) 환자의 탈수정도를 사정한다' 2.84±0.61점 순이었다.

임종간호에 대한 수행의 세부 항목을 살펴보면, '임종기(또는 생애말기) 환자의 연명의료 관련 법정서식 작성 유무를 확인한다'가 3.59±0.51점으로 가장 높고, '임종기(또는 생애말기) 환자에게 구강간호, 체위변경 등을 포함한 신체적 간호를 제공한다'가 3.51±0.54점, '임종기(또는 생애말기) 환자의 통증을 포함한 증상에 대한 약물요법을 수행한다' 3.46±0.52점 순이었고, '임종기(또는 생애말기) 환자와 가족의 영적 요구에 따라 종교인에게 의뢰하거나 영적 간호를 제공한다'가 2.21±0.79점으로 가장 낮게 나타났고, '임종기(또는 생애말기) 환자의 자살 사고에 대해 사정한다'가 2.31±0.78점, '임종기(또는 생애말기) 환자의 탈수정도를 사정한다'가 2.76±0.67점, '임종기(또는 생애말기) 환자의 간호를 위해 호스피스팀, 사회복지팀 등 다양한 분야의 전문가와 협력한다' 2.76±0.79점 순이었다(Table 2).

## 3. 대상자의 특성에 따른 임종간호에 대한 인식과 수행의 차이

대상자의 일반적 특성에 따른 임종간호에 대한 인식은 최근 6개월 이내 담당 환자의 죽음 경험 유무( $t=2.23$ ,  $P=0.045$ )에 따라 유의한 차이가 나타났다. 이외에 성별, 연령, 결혼상태, 종교, 교육수준, 총 임상경력, 현 부서경력, 근무부서, 임종간호교육 이수, 최근 6개월 이내 담당 환자의 죽음 경험 횟수, 최근 1년 이내 가족이나 친척, 지인의 죽음 경험에서는 차이가 없었다.

대상자의 일반적 특성에 따른 임종간호 수행은 근무부서( $t=2.18$ ,  $P=0.026$ )에 따라 유의한 차이가 나타났다. 이외에 성별, 연령, 결혼상태, 종교, 교육수준, 총 임상경력, 현 부서경력, 임종

Table 2. Perception and Performance of End-of-Life Care (N=321).

| Items                                                                                                                                                                                | Perception of end-of-life care | Performance of end-of-life care |
|--------------------------------------------------------------------------------------------------------------------------------------------------------------------------------------|--------------------------------|---------------------------------|
|                                                                                                                                                                                      | Mean ± SD                      | Mean ± SD                       |
| Subscale 1. Assessment                                                                                                                                                               |                                |                                 |
| 1. Identify individuals who are in the last days and hours of life.                                                                                                                  | 3.39 ± 0.49                    | 3.28 ± 0.49                     |
| 2. Assess the physical, psychological, social, and spiritual needs of dying (or the end of life) patients comprehensively.                                                           | 3.07 ± 0.52                    | 2.89 ± 0.59                     |
| 3. Assess the clinical symptoms and signs of dying (or the end of life) patients.                                                                                                    | 3.49 ± 0.51                    | 3.38 ± 0.54                     |
| 4. Assess the dehydration status of dying (or the end of life) patients.                                                                                                             | 2.84 ± 0.61                    | 2.76 ± 0.67                     |
| 5. Assess suicidal ideation in dying (or end of life) patients.                                                                                                                      | 2.46 ± 0.74                    | 2.31 ± 0.78                     |
| 6. Regularly reassess the symptoms and nursing needs of dying (or end of life) patients.                                                                                             | 3.31 ± 0.55                    | 3.23 ± 0.58                     |
| 7. Identify the decision-maker among the family members of the dying (or end of life) patients.                                                                                      | 3.47 ± 0.55                    | 3.38 ± 0.55                     |
| 8. Identify the dying (or end of life) patient's usual beliefs related to the advance care planning.                                                                                 | 3.12 ± 0.65                    | 2.91 ± 0.71                     |
| 9. Identify the family's beliefs related to the advance care planning.                                                                                                               | 3.16 ± 0.61                    | 2.97 ± 0.66                     |
| 10. Identify whether or not a dying (or end of life) patient has completed a legal form related to life-sustaining treatment.                                                        | 3.62 ± 0.50                    | 3.59 ± 0.51                     |
| 11. Reflect on and be aware of one's own attitudes and feelings about death.                                                                                                         | 3.22 ± 0.62                    | 3.11 ± 0.64                     |
| Subtotal                                                                                                                                                                             | 3.19 ± 0.34                    | 3.07 ± 0.36                     |
| Subscale 2. Communication                                                                                                                                                            |                                |                                 |
| 12. Understand and apply the basic principles of communication in end-of-life care.                                                                                                  | 3.19 ± 0.54                    | 3.10 ± 0.57                     |
| 13. Actively communicate with medical staff about hospice treatment for dying (or end of life) patients.                                                                             | 3.13 ± 0.63                    | 2.95 ± 0.66                     |
| 14. Support dying (or end of life) patients and their families to communicate with medical staff.                                                                                    | 3.30 ± 0.55                    | 3.15 ± 0.55                     |
| 15. Collaborate with experts in various fields such as hospice teams and social welfare teams as part of providing nursing care for dying (or end of life) patients                  | 3.03 ± 0.72                    | 2.76 ± 0.79                     |
| Subtotal                                                                                                                                                                             | 3.17 ± 0.47                    | 2.99 ± 0.48                     |
| Subscale 3. Plan and implementation                                                                                                                                                  |                                |                                 |
| 16. Include family members in treatment plans for dying (or end of life) patients.                                                                                                   | 3.42 ± 0.54                    | 3.28 ± 0.58                     |
| 17. Provide information on the risks and benefits of fluid treatment for dying (or end of life) patients so that patients and their families can participate in treatment decisions. | 3.11 ± 0.67                    | 2.93 ± 0.74                     |
| 18. Provide physical care including oral care and position change to dying (or end of life) patients.                                                                                | 3.52 ± 0.52                    | 3.51 ± 0.54                     |
| 19. Educate dying (or end of life) patients and their families on their symptoms and coping method.                                                                                  | 3.20 ± 0.65                    | 3.00 ± 0.75                     |
| 20. Identify the most effective route of drug administration for dying (or end of life) patients.                                                                                    | 3.34 ± 0.54                    | 3.32 ± 0.55                     |
| 21. Practice pharmacologic interventions for symptoms including pain in dying (or end of life) patients.                                                                             | 3.50 ± 0.52                    | 3.46 ± 0.52                     |
| 22. Practice non-pharmacological interventions for symptoms including pain for dying (or end of life) patients.                                                                      | 3.12 ± 0.63                    | 2.86 ± 0.67                     |
| 23. Review the medications currently used by dying (or end of life) patients and identify drug interactions and polypharmacy.                                                        | 3.09 ± 0.64                    | 2.96 ± 0.71                     |
| 24. Avoid undertaking tests that are unlikely to affect care in the last few days of life unless there is a clinical need to do                                                      | 3.45 ± 0.56                    | 3.27 ± 0.65                     |
| 25. Support the anxiety and fear of dying (or end of life) patients and their families.                                                                                              | 3.39 ± 0.54                    | 3.17 ± 0.64                     |
| 26. Refer to clergy or provide spiritual care according to the spiritual needs of dying (or end of life) patients and their families.                                                | 2.76 ± 0.83                    | 2.21 ± 0.79                     |
| 27. Document assessments and nursing intervention about dying (or end of life) patient care.                                                                                         | 3.39 ± 0.59                    | 3.34 ± 0.66                     |
| 28. Explain and support the post-care process to the family of a dying patient.                                                                                                      | 3.40 ± 0.57                    | 3.35 ± 0.60                     |
| Subtotal                                                                                                                                                                             | 3.28 ± 0.38                    | 3.13 ± 0.38                     |
| Total                                                                                                                                                                                | 3.23 ± 0.34                    | 3.08 ± 0.34                     |

간호교육 이수, 최근 6개월 이내 담당 환자의 죽음 경험과 횟수, 최근 1년 이내 가족이나 친척, 지인의 죽음 경험에서는 차이가 없었다(Table 3).

#### 4. 임종간호에 대한 인식과 수행 간의 상관관계

대상자의 임종간호에 대한 인식과 수행 간의 관계를 살펴보면, 임종간호에 대한 인식은 임종간호수행과 유의한 정적 상관관계가 나타나( $r=0.78, P<0.001$ ) 임종간호에 대한 인식이 높을수록

임종간호수행이 높음을 알 수 있다. 임종간호에 대한 인식은 임종간호수행 하부 영역별 임종기 사정( $r=0.70, P<0.001$ ), 의사소통( $r=0.62, P<0.001$ ), 계획과 중재( $r=0.75, P<0.001$ )와 유의한 정적 상관관계가 나타났다. 임종간호에 대한 인식의 하부 영역인 임종기 사정( $r=0.70, P<0.001$ ), 의사소통( $r=0.62, P<0.001$ ), 계획과 중재( $r=0.75, P<0.001$ )는 임종간호수행과 유의한 정적 상관관계가 나타났다(Table 4).

**Table 3.** Differences in Perception and Performance of End-of-Life Care according to General Characteristics of Participants (N=321).

| Characteristics                                                                           | Perception of end-of-life care |               | Performance of end-of-life care |               |
|-------------------------------------------------------------------------------------------|--------------------------------|---------------|---------------------------------|---------------|
|                                                                                           | Mean ± SD                      | t or F (P)    | Mean ± SD                       | t or F (P)    |
| Sex                                                                                       |                                |               |                                 |               |
| Female                                                                                    | 3.23±0.34                      | 0.20 (0.842)  | 3.08±0.34                       | -0.50 (0.621) |
| Male                                                                                      | 3.21±0.33                      |               | 3.13±0.37                       |               |
| Age (yr)                                                                                  |                                |               |                                 |               |
| 23~29                                                                                     | 3.24±0.32                      | 0.25 (0.776)  | 3.09±0.34                       | 0.18 (0.838)  |
| 30~39                                                                                     | 3.23±0.38                      |               | 3.07±0.35                       |               |
| 40~49                                                                                     | 3.18±0.37                      |               | 3.07±0.34                       |               |
| Marital status                                                                            |                                |               |                                 |               |
| Married                                                                                   | 3.23±0.39                      | -0.10 (0.921) | 3.07±0.35                       | 0.29 (0.771)  |
| Unmarried or other                                                                        | 3.23±0.23                      |               | 3.09±0.34                       |               |
| Religious status                                                                          |                                |               |                                 |               |
| Yes                                                                                       | 3.25±0.34                      | 0.93 (0.353)  | 3.11±0.34                       | 0.99 (0.324)  |
| No                                                                                        | 3.22±0.34                      |               | 3.10±0.34                       |               |
| Education level                                                                           |                                |               |                                 |               |
| Diploma                                                                                   | 3.16±0.24                      | 0.72 (0.489)  | 3.04±0.36                       | 0.21 (0.815)  |
| Bachelor                                                                                  | 3.23±0.34                      |               | 3.08±0.34                       |               |
| Master                                                                                    | 3.28±0.36                      |               | 3.11±0.34                       |               |
| Total clinical career (yr)                                                                |                                |               |                                 |               |
| <5                                                                                        | 3.24±0.32                      | 0.31 (0.818)  | 3.10±0.34                       | 0.57 (0.637)  |
| 5~<10                                                                                     | 3.21±0.35                      |               | 3.05±0.33                       |               |
| 10~<15                                                                                    | 3.29±0.43                      |               | 3.08±0.41                       |               |
| ≥15                                                                                       | 3.20±0.36                      |               | 3.05±0.31                       |               |
| Current clinical career (yr)                                                              |                                |               |                                 |               |
| <5                                                                                        | 3.23±0.33                      | 1.46 (0.235)  | 3.09±0.34                       | 1.58 (0.207)  |
| 5~<10                                                                                     | 3.20±0.36                      |               | 3.02±0.35                       |               |
| ≥10                                                                                       | 3.35±0.41                      |               | 3.17±0.36                       |               |
| Unit type                                                                                 |                                |               |                                 |               |
| Ward                                                                                      | 3.26±0.34                      | 1.91 (0.058)  | 3.11±0.35                       | 2.18 (0.026)  |
| ICU                                                                                       | 3.18±0.34                      |               | 3.02±0.32                       |               |
| Participation in education for end-of-life care                                           |                                |               |                                 |               |
| Yes                                                                                       | 3.25±0.37                      | 0.61 (0.542)  | 3.13±0.34                       | 1.41 (0.160)  |
| No                                                                                        | 3.22±0.33                      |               | 3.07±0.34                       |               |
| Patient deaths overseen within the last 6 months                                          |                                |               |                                 |               |
| Yes                                                                                       | 3.24±0.34                      | 2.23 (0.045)  | 3.09±0.34                       | 1.92 (0.056)  |
| No                                                                                        | 3.09±0.36                      |               | 2.96±0.34                       |               |
| The number of patient deaths overseen within the last 6 months*                           |                                |               |                                 |               |
| 1~5                                                                                       | 3.23±0.33                      | 1.41 (0.245)  | 3.07±0.33                       | 2.88 (0.058)  |
| 6~10                                                                                      | 3.27±0.34                      |               | 3.16±0.34                       |               |
| ≥11                                                                                       | 3.35±0.40                      |               | 3.22±0.42                       |               |
| Experiences of death of family members, relatives, and acquaintances within the past year |                                |               |                                 |               |
| Yes                                                                                       | 3.23±0.33                      | -0.04 (0.968) | 3.09±0.34                       | -0.21 (0.838) |
| No                                                                                        | 3.23±0.34                      |               | 3.08±0.34                       |               |

ICU: Intensive care unit, \*n=294.

## 고찰

본 연구는 임종기 환자와 가족을 대상으로 의사소통을 포함하

여 간호사의 임종간호에 대한 인식과 수행 연구도구를 개발하여 일 상급종합병원 간호사를 대상으로 임종간호에 대한 인식과 수행을 조사하고 관계를 확인하여 추후 임종간호 교육프로그램

Table 4. Relationships between the Perception and Performance of End-of-Life Care (N=321).

| Variables                       | Perception of end-of-life care |               |               |                             |
|---------------------------------|--------------------------------|---------------|---------------|-----------------------------|
|                                 | Total                          | Assessment    | Communication | Planning and implementation |
|                                 | r (P)                          | r (P)         | r (P)         | r (P)                       |
| Performance of end-of-life care |                                |               |               |                             |
| Total                           | 0.78 (<0.001)                  | 0.70 (<0.001) | 0.62 (<0.001) | 0.75 (<0.001)               |
| Assessment                      | 0.70 (<0.001)                  | 0.74 (<0.001) | 0.53 (<0.001) | 0.60 (<0.001)               |
| Communication                   | 0.62 (<0.001)                  | 0.53 (<0.001) | 0.69 (<0.001) | 0.54 (<0.001)               |
| Planning and implementation     | 0.75 (<0.001)                  | 0.56 (<0.001) | 0.53 (<0.001) | 0.77 (<0.001)               |

개발을 위한 근거자료를 제공하고자 하였다.

이전의 간호사의 임종간호수행 연구도구는 환자를 중심으로 하거나 가족이 일부 포함되어 있었다[10,12]. 그러나, 임종간호수행의 장애요인으로 환자와 가족영역이 높게 나타났고[10], 불충분한 의사소통[9]이 제시되어 본 연구에서는 임종간호에 대한 임종기 환자와 가족을 대상으로 한 의사소통을 포함한 임종간호에 대한 인식과 수행을 측정할 수 있는 도구를 개발하여 측정하였다. 추후 도구에 대한 타당성을 확인할 필요가 있을 것으로 보인다. 본 연구에서 간호사의 임종간호에 대한 인식은 평균 3.23 ± 0.34점(4점 만점)으로 나타나 상급종합병원 임종 다빈도 부서에서 근무하는 간호사의 임종간호에 대한 인식 수준은 중간 수준 이상임을 확인할 수 있었다. 병원간호사의 임종간호에 대한 인식을 탐색한 연구[18]에서 환자의 죽음을 지켜보면서 자신의 삶의 의미를 찾고, 임종 경험이 많을수록 임종간호를 잘 할 수 있다고 인식하고 있었는데, 본 연구는 임종을 다빈도로 경험하는 부서의 간호사를 연구대상으로 한 점과 본 연구기관은 상급종합병원으로 병동 환자의 중증도가 높고, 적극적인 치료가 이루어지는 급성기 환자간호와 임종을 앞둔 말기 암환자 간호를 동시에 하고 있으며, 죽음을 빈번하게 접할 수밖에 없는 임상현장에서의 상황이 반영된 것으로 생각된다.

임종간호에 대한 인식의 세부 항목을 살펴보면, 임종 환자의 연명의료 관련 법정서식 확인과 신체적 간호 및 통증을 포함한 증상에 대한 약물요법에 대한 점수가 높게 나타났다. 이는 연명의료결정법에 따라 관련 서식을 우선적으로 확인하여 환자의 의사를 파악하며[19], 통증 조절 및 증상관리를 위한 약물요법의 중요성을 인식하고 있음을 확인할 수 있었다. 반면, 임종기 환자의 자살 사고를 사정하거나 영적 간호 제공 및 탈수 정도를 사정하는 항목에 대한 인식은 낮게 나타났다.

대상자의 일반적 특성에 따른 임종간호에 대한 인식은 최근 6개월 이내 담당 환자의 죽음 경험 유무에 따라 유의한 차이가 나타났다. 임상현장에서 환자의 죽음은 가장 힘들고 어려운 일이며 적절히 대처하지 못하면 임종간호의 질을 저하시킬 수 있는데

[20], 담당 환자의 죽음을 통해 임종간호에 대한 의미를 되새겨 보았음을 추정해 볼 수 있다. 임종간호 교육이수 여부에 따른 임종간호에 대한 인식은 유의한 차이가 없어 선행연구 결과[11]와 차이가 나타났는데, 본 연구의 대상자 중 23.7%만이 임종간호 교육을 받았고, 임상경력 5년 미만만이 55.5%로 절반 이상을 차지하고 있어 임종간호 교육보다는 질환 및 치료에 대한 교육을 중점적으로 받았을 것으로 생각된다. 임종간호와 관련된 지식과 기술의 부족은 임종환자 간호의 스트레스의 주요 요인으로 작용하여[6] 임종간호 교육을 통해 임종간호에 대한 인식을 높이고 긍정적인 변화를 통하여 임종간호의 질을 향상시킬 수 있을 것으로 생각된다.

본 연구에서 임종간호수행은 3.08 ± 0.34점(4점 만점)이었고, 중간 수준 이상으로 높게 나타났다. 임종간호에 대한 수행의 세부 항목을 살펴보면, 임종기 환자의 연명의료 관련 법정서식 작성 유무 확인, 구강간호와 체위변경 등을 포함한 신체적 간호 제공 및 통증을 포함한 증상에 대한 약물요법 수행이 높게 나타났다. 연명의료결정법의 시행에 따라 환자의 의사확인을 위한 법적 서식은 필수사항이므로 우선적으로 확인하고 있었다[19]. 또한, 임종기 환자에서는 마약성 진통제가 가장 많이 투여되고, 항궤양제, 진정제 및 항불안제 등이 사용되는데[21], 본 연구에서 임종기 환자의 증상관리가 적극적으로 수행되고 있음을 확인할 수 있었다.

반면, 종교인에게 의뢰하거나 영적 간호 제공, 환자의 자살 사고 사정 및 탈수 정도 사정, 타 분야 전문가와 협력이 낮게 나타났다. 이러한 항목은 임종간호에 대한 인식에서도 낮게 나타났다. 임종간호에서 증상 완화와 같은 신체적 간호에 집중되어 있고, 시간 부족 등의 이유로 영적 간호는 적게 수행되고 있는 선행연구 결과와[10,22] 유사하였다. 임종간호교육 프로그램에 영적 간호의 중요성과 간호방법에 대한 내용을 포함해야 하며[10,22] 임종기 환자를 위한 전인적 돌봄을 위해 임종기 환자의 영적 요구를 사정하고 병원 내 종교시설과 연계하여 성직자 방문, 기도 등을 포함한 영적 간호의 강화와 영적 간호에 대한 인식의 변화

가 필요하다. 암환자는 우울, 불안, 섬망 등을 경험하고 재발, 전이, 질병의 진행으로 인한 절망감과 조절되지 않은 통증 등으로 인해 자살 위험이 높다[23]. 이에 대해 국외 지침에서는 자살 과거력 등을 사정하도록 권고하고 있어[16] 임종기 환자의 정신적 측면에 대해 관심을 가지고 사정이 이루어져야 하며 필요에 따라 정신건강전문의와의 상담도 필요할 것이다. 또한, 임종기 환자에서 수분공급이 말기 암환자의 생존을 연장하거나 탈수증상을 유의하게 개선시키지 않는 것으로 보고되었지만 임종의 질에는 영향을 미치는 것으로 나타났다[24]. 환자의 탈수 정도를 사정하는 것은 임종간호의 중요한 부분으로 생각되지만 본 연구에서 이에 대한 인식과 수행이 모두 낮게 나타났다. 임종의 질 향상을 위해 신체간호를 수행할 때 임종기 환자의 탈수정도를 사정하는 항목을 포함하여야 할 것이다.

근무부서에 따라 병동간호사의 임종간호수행이 중환자실 간호사보다 유의하게 높게 나타났는데, 선행연구결과 내·외과 병동 및 중환자실을 대상으로 한 연구에서는 부서별로 차이가 나타나지 않았고[25] 임종 다빈도 부서인 종양내과병동과 중환자실의 임종간호수행 정도는 유사하였으나 응급실보다는 높게 나타나[11] 선행연구 결과와 차이가 있었다. 본 연구의 임종간호수행 연구도구는 선행연구와 달리 가족 사정 및 의사소통 내용의 문항이 포함되어있는데, 중환자의 특성 상 환자와 가족의 참여가 어려울 수 있어[26] 차이가 나타난 것으로 생각된다. 중환자에게 시행되는 적극적이고 침습적인 중재를 중단하게 되는 치료의 변화는 오해, 갈등, 도덕적 디스트레스, 연명의료의 보류 및 철회와 관련된 윤리적 딜레마를 초래할 수 있다[26]. 따라서, 환자와 가족의 갈등을 유발할 수 있는 문화적, 사회적 요인을 파악하여 조기에 가족이 의사결정에 참여하고 임종기 환자와 함께 할 수 있는 기회를 제공해 주어야 한다[26]. 사전돌봄계획과 같이 체계적인 임종간호제공은 노인 입원 환자와 가족으로 하여금 죽음에 대한 스트레스 및 불안, 우울 등 부정적인 감정을 감소시킬 뿐 아니라 환자의 남은 삶에 긍정적인 영향을 미칠 수 있다[27]. 뿐만 아니라 환자의 죽음을 다빈도로 경험하는 응급실, 중환자실, 종양내과 병동 간호사의 임종간호 스트레스와 부담감을 감소시킬 수 있는 방안이 될 수 있을 것이다[11]. 일반 병동 임종 과정에 있는 환자와 가족을 위한 국내 임종 돌봄 임상진료지침에서는 임종기 환자와 가족에게 임종 돌봄에 필요한 정보를 제공하고 가족 돌봄을 위한 평가를 하도록 제시하고 있어 임종기 환자에서 환자와 더불어 가족을 포함한 중재가 이루어져야 한다[28].

본 연구에서 임종간호에 대한 인식이 높을수록 임종간호수행이 높게 나타났고 선행연구 결과와 유사하였다[11]. 따라서, 임종간호에 대한 인식의 변화를 통해 임종간호수행의 향상을 모색할 수 있을 것이다. 간호사는 담당 환자의 죽음을 슬퍼하며 감정에 치

우치게 되면 일하기가 어려워 자신의 감정을 뒤로 한 채 업무를 수행하거나, 소생이 어려운 환자와는 라포 형성에 소극적인 태도를 보이기도 한다. 또는 더 수준 높은 임종간호를 제공하고자 교육을 받고 싶어하거나 환자의 죽음을 통해 삶의 의미를 찾고 발전하고자 하는 다양한 임종간호에 대한 인식이 나타났다[17]. 생애 말 연명치료에 대해 중환자실 간호사는 환자의 고통, 존엄성이 침해된 죽음, 가족과 격리된 환자, 연명의료 선택에 대한 후회, 가족의 부담감과 같은 부정적인 인식과 반면, 환자와 가족의 연명의지, 가족의 도리와 같이 긍정적으로도 인식하고 있었다[29]. 간호사의 임종간호수행에 가장 중요한 요인은 임종간호에 대한 인식의 긍정적인 변화이다. 간호사는 임종간호에 있어 환자와 가족을 치료 계획에 참여시키고 조언을 제공하는데 매우 중요한 역할을 수행하고 있지만 임종간호수행에 대한 체계적인 교육은 부족한 실정이다[13,20]. 임종을 다빈도로 경험하는 부서에서는 신입 간호사부터 임종간호에 대한 체계적 교육을 통해 임종간호에 대한 태도가 긍정적으로 자리 잡을 수 있도록 지지할 필요가 있다.

상급종합병원 간호사는 중증의 환자뿐만 아니라 회복하기 어려운 환자를 간호하는 경우가 많아졌고, 시간이 지남에 따라 환자의 죽음에 대처하는 방법을 배우게 되지만 죽음과 임종, 사별 간호 및 애도 상담에 대한 교육프로그램은 대처를 돕는데 좀 더 효과적일 수 있다. 이를 통해 임종간호를 하는 데 있어 간호사의 성장을 촉진하여 간호사의 죽음에 대한 불안과 스트레스를 감소시키고 정서적 건강과 직업만족도를 높여 임종환자와 가족에게 제공되는 치료의 질을 향상시킬 수 있을 것이다[20].

본 연구는 일 상급종합병원 간호사를 대상으로 하였으며, 최신 지침을 근거하여 예비문항을 구성하고 전문가 타당도를 거친 임종간호에 대한 인식과 수행에 대한 도구를 개발하였지만, 델파이 조사나 예비 조사 등을 시행하지 못하여 연구결과를 일반화하는데에는 제한점이 있다. 또한, 임종간호에 대한 인식과 수행 연구도구의 응답범주는 다르지만 동일한 연구도구를 사용하여 상관관계는 높게 나타났지만 대상자의 설문조사 응답에 영향을 주었을 가능성이 있다. 그러나, 본 연구를 통하여 임종기 환자의 증상과 요구를 사정하고, 가족과의 의사소통, 신체적 간호, 약물요법과 비약물요법을 포함한 중재를 제공하는 일련의 임종간호수행 과정을 확인해볼 수 있었으며, 이는 실무중심의 임종간호 교육프로그램 내용을 구성하는데 활용될 수 있을 것이다. 또한, 탈수 정도 사정, 자살사고와 같은 정신적인 측면 사정, 영적 간호 제공 등의 내용을 포함한 임종간호 교육프로그램 개발을 제안한다. 간호사는 임종간호에서 상당한 스트레스와 어려움을 경험하고 있으며[13] 이를 해결하기 위한 개인, 조직 차원의 지지를 호소하고 있으나 미흡한 상황이며, 이와 관련된 교육도 여전히 부족한



실정이다. 본 연구뿐만 아니라 추후 임종간호에 대한 연구를 통해 간호사의 임종간호의 어려움을 해결하기 위한 지속적인 노력이 필요하다.

## 요약

**목적:** 본 연구는 일 상급종합병원 임종 다빈도 부서의 간호사를 대상으로 임종간호에 대한 인식과 수행을 확인하고 관계를 파악하고자 하였다.

**방법:** 본 연구는 횡단적 서술적 조사연구로 서울시에 소재한 일 상급종합병원에서 병동과 중환자실을 포함하여 임종을 다빈도로 경험하는 부서의 간호사 중 6개월 이상 근무하고 임종간호 경험이 1회 이상 있는 321명을 대상으로 하였다. 구조화된 설문지를 이용하여 임종간호에 대한 인식과 수행을 조사하였다.

**결과:** 간호사의 임종간호에 대한 인식은 평균  $3.23 \pm 0.34$ 점(4점 만점)이었고, 임종간호수행은  $3.08 \pm 0.34$ 점(4점 만점)이었다. 간호사의 임종간호에 대한 인식은 임종간호수행과 유의한 정적 상관관계가 나타났다( $r=0.78, P<0.001$ ).

**결론:** 본 연구의 결과를 토대로 임종 다빈도 부서의 간호사를 위한 임종환자의 탈수정도 사정, 자살사고와 같은 정신적인 측면 사정, 영적 간호 제공 등의 내용을 포함한 체계적이고 표준화된 교육 프로그램의 개발과 적용이 필요하다.

**중심단어:** 임종간호, 간호사, 인식, 업무수행

## CONFLICT OF INTEREST

No potential conflict of interest relevant to this article was reported.

## ORCID

Seo Yeon Jung, <https://orcid.org/0009-0002-0652-9514>

Hyun Seung Song, <https://orcid.org/0009-0001-4498-7092>

Ji Youn Kim, <https://orcid.org/0000-0001-8354-1838>

Hoi Jung Koo, <https://orcid.org/0009-0005-0044-3607>

Yong Soon Shin, <https://orcid.org/0000-0002-9854-9549>

Sung Reul Kim, <https://orcid.org/0000-0002-1768-0829>

Jeong Hye Kim, <https://orcid.org/0000-0001-5384-706X>

## AUTHOR'S CONTRIBUTIONS

Conception or design of the work: all authors. Data collection: SYJ, HSS, JYK, HJK. Data analysis and interpretation: all authors. Drafting the article: SYJ, JHK. Critical revision of the article: SYJ, JHK. Final approval of the version to be published: all authors.

## REFERENCES

1. Ministry of Health and Welfare. News & welfare [Internet]. Sejong: Ministry of Health and Welfare; 2022 [cited 2022 Nov 16]. Available from: [http://www.mohw.go.kr/react/al/sal0301vw.jsp?PAR\\_MENU\\_ID=04&MENU\\_ID=0403&CONT\\_SEQ=348830&page=1](http://www.mohw.go.kr/react/al/sal0301vw.jsp?PAR_MENU_ID=04&MENU_ID=0403&CONT_SEQ=348830&page=1).
2. Gutierrez Sanchez D, Perez Cruzado D, Cuesta-Vargas AI. The quality of dying and death measurement instruments: a systematic psychometric review. *J Adv Nurs Epup* 2018 Apr 19.
3. Bloomer MJ, Endacott R, O'Connor M, Cross W. The 'dis-ease' of dying: challenges in nursing care of the dying in the acute hospital setting. A qualitative observational study. *Palliat Med* 2013;27:757-64.
4. Gagnon J, Duggleby W. The provision of end-of-life care by medical-surgical nurses working in acute care: a literature review. *Palliat Support Care* 2014;12:393-408.
5. Statistics Korea. Population trend survey in 2021 [Internet]. Daejeon: Statistics Korea; 2022 [cited 2022 Nov 16]. Available from: [http://ko-stat.go.kr/portal/korea/kor\\_nw/1/1/index.board?bmode=read&aSeq=416897](http://ko-stat.go.kr/portal/korea/kor_nw/1/1/index.board?bmode=read&aSeq=416897).
6. Jung MY, Matthews AK. Understanding nurses' experiences and perceptions of end-of-life care for cancer patients in Korea: a scoping review. *J Palliat Care* 2021;36:255-64.
7. Kang J, Choi EK, Seo M, Ahn GS, Park HY, Hong J, et al. Care for critically and terminally ill patients and moral distress of physicians and nurses in tertiary hospitals in South Korea: a qualitative study. *PLoS One* 2021;16:e0260343.
8. Kehl KA, Kowalkowski JA. A systematic review of the prevalence of signs of impending death and symptoms in the last 2 weeks of life. *Am J Hosp Palliat Care* 2013;30:601-16.
9. Gerber K, Willmott L, White B, Yates P, Mitchell G, David C. et al. Barriers to adequate pain and symptom relief at the end of life: a qualitative study capturing nurses' perspectives. *Collegian* 2022;29:1-8.

10. Ko MJ, Moon SH. Factors influencing performance of end-of-life care by ICU nurses. *J Korean Acad Psychiatr Ment Health Nurs* 2016;25:327-37.
11. Seo MJ, Kim JY, Kim AH, Lee TW. Nurses attitudes toward death, coping with death and understanding and performance regarding EOL care: Focus on nurses at ED, ICU and oncology department. *Korean J Hosp Palliat Care* 2013;16:108-17.
12. Park HJ, Lee YM, Won MH, Lim SJ, Son YJ. Hospital nurses' perception of death and self-reported performance of end-of-life care: mediating role of attitude towards end-of-life care. *Healthcare (Basel)* 2020;8:142.
13. Kim LH, Kim SY, Kim S, Kim HA, Yang HJ, Lee KM, et al. A mixed method study for exploring the difficulties in end-of-life care and end-of-life care competency in nurses who take care of cancer patients. *Asian Oncol Nurs* 2021;21:98-109.
14. Registered Nurses' Association of Ontario. End-of-life care during the last days and hours [Internet]. Toronto, Ont.: Registered Nurses' Association of Ontario; 2011 [cited 2020 Jan 4]. Available from: [https://mao.ca/sites/mao-ca/files/End-of-Life\\_Care\\_During\\_the\\_Last\\_Days\\_and\\_Hours\\_0.pdf](https://mao.ca/sites/mao-ca/files/End-of-Life_Care_During_the_Last_Days_and_Hours_0.pdf).
15. National institute for health and Care Excellence. End of life care for adults: service delivery [Internet]. London: National institute for health and Care Excellence; 2019 [cited 2020 Jan 4]. Available from: <https://www.nice.org.uk/guidance/ng142>.
16. National Consensus Project for Quality Palliative Care; National Coalition for Hospice and Palliative Care. Clinical practice guidelines for quality palliative care. 4th ed. [Internet]. Richmond, VA: National Coalition for Hospice and Palliative Care; 2018 [cited 2020 Jan 4]. Available from: <https://www.nationalcoalitionhpc.org/ncp/>.
17. National Cancer Center; National Hospice Center. Casebook of end-of-life care in general wards [Internet]. Goyang: National Cancer Center; National Hospice Center; 2018 [cited 2020 Jan 4]. Available from: <https://hospice.go.kr:8444/index.html?menu=22>.
18. Kim YJ, Kim MH. Hospital nurses' perception of hospice care. *Journal of KSSSS* 2019;48:109-27.
19. Korean Law Information Center. Act on decisions on life-sustaining treatment for patients in hospice and palliative care or at the end of life [Internet]. Sejong: Ministry of Health and Welfare; 2022 [cited 2023 May 10]. Available from: <https://www.law.go.kr/%EB%B2%95%EB%A0%B9/%EC%97%B0%EB%AA%85%EC%9D%98%EB%A3%8C%EA%B2%B0%EC%A0%95%EB%B2%95>.
20. Zheng R, Lee SF, Bloomer MJ. How nurses cope with patient death: a systematic review and qualitative meta-synthesis. *J Clin Nurs* 2018;27:e39-e49.
21. Yun HS, Choi YS, Kim SH, Lee YJ, Park JY. Analysis of drugs prescribed for terminal cancer patients two weeks before death in a palliative care unit. *Korean J Fam Pract* 2022;12:346-53.
22. Woo YW, Kim KH, Kim KS. Death anxiety and terminal care stress among nurses and the relationship to terminal care performance. *Korean J Hosp Palliat Care* 2013;16:33-41.
23. Cho SJ. Psychiatric and psychosocial intervention for cancer patients and their families. *J Korean Neuropsychiatr Assoc* 2007;46:430-46.
24. Wu CY, Chen PJ, Ho TL, Lin WY, Cheng SY. To hydrate or not to hydrate? The effect of hydration on survival, symptoms and quality of dying among terminally ill cancer patients. *BMC Palliat Care* 2021;20:13.
25. Kim SK, Kim SH, Yun HY. Factors that influence end-of-life care provided by nurses in general hospitals. *Korean J Med Ethics* 2019;22:53-72.
26. Tanaka Gutiez M, Efstathiou N, Innes R, Metaxa V. End-of-life care in the intensive care unit. *Anaesthesia* 2023;78:636-43.
27. Detering KM, Hancock AD, Reade MC, Silvester W. The impact of advance care planning on end of life care in elderly patients: randomised controlled trial. *BMJ*. 2010;340:c1345.
28. Shin J, Chang YJ, Park SJ, Choi JY, Kim SH, Choi YS, et al. Clinical practice guideline care for last days of life. *Korean J Hosp Palliat Care* 2020; 23:103-13.
29. Koh CK, Ko CM, Park H. Critical care nurses' perception of life-sustaining treatment at end of life: a content analysis. *J Korean Crit Care Nurs* 2017;10:41-50.
